# Supplementary material for: Genome-Wide Associations of Chlorophyll Fluorescence OJIP Transient Parameters Connected With Soil Drought Response in Barley
Source: Front Plant Sci. 2019 Feb 11;10:78. doi: 10.3389/fpls.2019.00078 (PMC6384533; doi:10.3389/fpls.2019.00078)
Supplement: Supplementary Table S3 — Associations of DArTseq and SNP markers with physiological parameters in well-watered barley plants (control) after FDR correction. [file Table_3.XLSX]

## Sheet: FDR correction_control
trait	marker/ *SNP marker	pos	marker_F	p	marker rsq	marker df	marker MS	error df	error MS	model df	model MS	ranking	FDR treshold	pass/not pass (1/0)	FDR treshold 2	pass/not pass2 (1/0)
RWC	3256622*	17306	23.7945	4.00449e-06	0.166858	1	106.183	101	4.46249	4	46.4141	1	2.35349e-06	0	0.000177305	1
RWC	3256622*	17307	23.7945	4.00449e-06	0.166858	1	106.183	101	4.46249	4	46.4141	2	4.70699e-06	1	0.00035461	1
RWC	3986693	3881	19.4371	2.55858e-05	0.138961	1	90.6221	103	4.66233	4	42.98	3	7.06048e-06	0	0.000531915	1
REo/RC	3264659	6911	18.8251	3.60364e-05	0.162717	1	0.0357043	94	0.00189663	4	0.0102856	4	9.41398e-06	0	0.00070922	1
DIo/RC	3261823	7933	18.7085	3.75971e-05	0.162399	1	0.0182801	95	0.000977106	4	0.00493455	5	1.17675e-05	0	0.000886525	1
ABS/RC	100005478*	20234	20.0928	4.19835e-05	0.273812	1	0.285306	51	0.0141994	4	0.0794528	6	1.4121e-05	0	0.00106383	1
ABS/RC	100005478*	20235	20.0928	4.19835e-05	0.273812	1	0.285306	51	0.0141994	4	0.0794528	7	1.64745e-05	0	0.00124113	1
DIo/RC	3987085*	14869	17.6224	5.88979e-05	0.150252	1	0.017976	99	0.00102006	4	0.00466321	8	1.8828e-05	0	0.00141844	1
Fv/Fm	3257700*	16605	17.7484	5.97473e-05	0.157748	1	0.000449306	90	2.53153e-05	4	0.000142471	9	2.11815e-05	0	0.00159574	1
DIo/RC	3275548	8402	17.3891	6.62973e-05	0.151077	1	0.016812	97	0.000966812	4	0.00437512	10	2.35349e-05	0	0.00177305	1
DIo/RC	100005478*	20235	18.5352	7.58039e-05	0.24904	1	0.0133662	51	0.000721126	4	0.00422339	11	2.58884e-05	0	0.00195035	1
DIo/RC	100005478*	20234	18.5352	7.58039e-05	0.24904	1	0.0133662	51	0.000721126	4	0.00422339	12	2.82419e-05	0	0.00212766	1
TRo/RC	100005478*	20234	18.4463	7.84416e-05	0.258817	1	0.175166	51	0.00949602	4	0.0481247	13	3.05954e-05	0	0.00230496	1
TRo/RC	100005478*	20235	18.4463	7.84416e-05	0.258817	1	0.175166	51	0.00949602	4	0.0481247	14	3.29489e-05	0	0.00248227	1
DIo/RC	3266186	6874	16.7597	8.50635e-05	0.139692	1	0.0172171	102	0.00102729	4	0.0046166	15	3.53024e-05	0	0.00265957	1
DIo/RC	5249861*	14368	17.4518	8.83806e-05	0.207489	1	0.0154661	66	0.000886215	4	0.00401224	16	3.76559e-05	0	0.00283688	1
DIo/RC	5249861*	14369	17.4518	8.83806e-05	0.207489	1	0.0154661	66	0.000886215	4	0.00401224	17	4.00094e-05	0	0.00301418	1
DIo/RC	5250275*	15053	16.557	9.43964e-05	0.14067	1	0.0170838	100	0.00103182	4	0.00456597	18	4.23629e-05	0	0.00319149	1
DIo/RC	5250275*	15052	16.557	9.43964e-05	0.14067	1	0.0170838	100	0.00103182	4	0.00456597	19	4.47164e-05	0	0.00336879	1
DIo/RC	3257387*	14796	16.499	9.46018e-05	0.135625	1	0.0167965	104	0.00101803	4	0.00449252	20	4.70699e-05	0	0.0035461	1
DIo/RC	3987044	8682	16.3434	0.000102733	0.136957	1	0.016853	102	0.00103118	4	0.00446814	21	4.94234e-05	0	0.0037234	1
PItotal	5249861*	14369	16.8374	0.000114219	0.202237	1	1.46719	66	0.0871388	4	0.375911	22	5.17769e-05	0	0.00390071	1
PItotal	5249861*	14368	16.8374	0.000114219	0.202237	1	1.46719	66	0.0871388	4	0.375911	23	5.41304e-05	0	0.00407801	1
DIo/RC	3987066	8551	15.9954	0.000126438	0.144494	1	0.0160085	94	0.00100082	4	0.00417828	24	5.64839e-05	0	0.00425532	1
DIo/RC	3274753	8442	15.8667	0.000126947	0.132235	1	0.0163024	103	0.00102746	4	0.00436368	25	5.88374e-05	0	0.00443262	1
DIo/RC	5255890	8662	15.7129	0.000136956	0.132175	1	0.0162942	102	0.00103699	4	0.00437611	26	6.11909e-05	0	0.00460993	1
REo/RC	3430791	5469	15.7397	0.000140131	0.135176	1	0.0287764	96	0.00182826	4	0.00934181	27	6.35444e-05	0	0.00478723	1
PIcsm	3987102*	13628	15.6031	0.000142484	0.126941	1	3.97253e+06	104	254599	4	1.20402e+06	28	6.58979e-05	0	0.00496454	1
DIo/RC	3257387*	14797	15.5678	0.000144815	0.128967	1	0.015972	104	0.00102596	4	0.00428638	29	6.82514e-05	0	0.00514184	1
REo/RC	3255247*	20237	15.4225	0.000158183	0.12878	1	0.0311741	100	0.00202134	4	0.00998467	30	7.06048e-05	0	0.00531915	1
DIo/RC	3430780*	20173	16.2161	0.000163639	0.201585	1	0.0170658	59	0.0010524	4	0.0056416	31	7.29583e-05	0	0.00549645	1
RWC	5256826	5817	15.2668	0.000169887	0.118137	1	73.6776	100	4.82601	4	35.2651	32	7.53118e-05	0	0.00567376	1
PIABS	3987102*	13628	15.1039	0.00017934	0.124626	1	0.87385	104	0.0578561	4	0.24869	33	7.76653e-05	0	0.00585106	1
DIo/RC	3912298*	19375	16.3402	0.000182684	0.232305	1	0.012851	50	0.000786465	4	0.00399906	34	8.00188e-05	0	0.00602837	1
DIo/RC	3912298*	19374	16.3402	0.000182684	0.232305	1	0.012851	50	0.000786465	4	0.00399906	35	8.23723e-05	0	0.00620567	1
PIcso	3987102*	13628	14.8459	0.000202081	0.121582	1	130939	104	8819.86	4	39922.9	36	8.47258e-05	0	0.00638298	1
DIo/RC	3664925	8687	14.8647	0.000202325	0.125735	1	0.015327	102	0.0010311	4	0.00418171	37	8.70793e-05	0	0.00656028	1
REo/RC	3396343	3899	14.9639	0.00020437	0.134268	1	0.030591	92	0.00204432	4	0.00993968	38	8.94328e-05	0	0.00673759	1
DIo/RC	3430642*	18975	15.9954	0.000209574	0.23185	1	0.0188097	50	0.00117595	4	0.00558286	39	9.17863e-05	0	0.00691489	1
REo/RC	3397770	5925	14.7681	0.000212628	0.123603	1	0.0298149	101	0.00201886	4	0.00932734	40	9.41398e-05	0	0.0070922	1
DIo/RC	3269029	7361	14.7706	0.000213473	0.127746	1	0.0156027	100	0.00105633	4	0.00412618	41	9.64933e-05	0	0.0072695	1
ETo/RC	5251413	8063	14.7164	0.000216693	0.122614	1	0.0392832	102	0.00266935	4	0.012027	42	9.88468e-05	0	0.00744681	1
DIo/RC	3267607	8048	14.7557	0.000218396	0.130962	1	0.0146029	97	0.000989647	4	0.00387735	43	0.0001012	0	0.00762411	1
Fv/Fm	3260252	348	14.6972	0.000223149	0.125873	1	0.000391152	98	2.6614e-05	4	0.000124834	44	0.000103554	0	0.00780142	1
RWC	3269952*	16333	14.9344	0.000223396	0.141883	1	3.06258	81	0.205069	4	1.24367	45	0.000105907	0	0.00797872	1
DIo/RC	3661600	7968	14.7101	0.000224249	0.131115	1	0.0157468	96	0.00107048	4	0.00433341	46	0.000108261	0	0.00815603	1
ABS/RC	3430780*	20172	15.3858	0.000231207	0.189406	1	0.310883	59	0.0202058	4	0.112303	47	0.000110614	0	0.00833333	1
DIo/RC	3274215	7930	14.5834	0.000239009	0.131771	1	0.0159677	95	0.00109492	4	0.00429	48	0.000112968	0	0.00851064	1
Fv/Fm	3930269	5634	14.6428	0.000244111	0.140088	1	0.000394303	87	2.69281e-05	4	0.000117981	49	0.000115321	0	0.00868794	1
TRo/CS	5244070	1406	14.4727	0.000245013	0.11214	1	2410.06	100	166.525	4	1209.74	50	0.000117675	0	0.00886525	1
DIo/RC	3987002	8683	14.4496	0.000245238	0.123073	1	0.0152032	102	0.00105215	4	0.00405267	51	0.000120028	0	0.00904255	1
DIo/RC	5251440	9574	14.4256	0.000247988	0.122801	1	0.0149524	102	0.00103651	4	0.0040092	52	0.000122382	0	0.00921986	1
Fv/Fm	3254763*	12284	14.3431	0.000255309	0.117425	1	0.000393487	104	2.74339e-05	4	0.000124457	53	0.000124735	0	0.00939716	1
DIo/RC	5256736	9171	14.3081	0.000264445	0.123994	1	0.014923	100	0.00104297	4	0.00401373	54	0.000127089	0	0.00957447	1
ABS/CS	5244070	1406	14.296	0.000265938	0.111365	1	4046.35	100	283.041	4	2007.55	55	0.000129442	0	0.00975177	1
REo/RC	3398380*	17639	14.2478	0.000269377	0.118605	1	0.028891	102	0.00202774	4	0.00918991	56	0.000131796	0	0.00992908	1
REo/RC	3398380*	17638	14.2478	0.000269377	0.118605	1	0.028891	102	0.00202774	4	0.00918991	57	0.000134149	0	0.0101064	1
DIo/RC	5253261	8489	14.1601	0.000278079	0.118703	1	0.0147008	104	0.00103819	4	0.00396859	58	0.000136503	0	0.0102837	1
Fv/Fm	3268966	4229	14.2183	0.000278449	0.124092	1	0.000390874	98	2.7491e-05	4	0.000113937	59	0.000138856	0	0.010461	1
Fv/Fm	3921065	4706	14.1837	0.000278848	0.119574	1	0.00039957	101	2.8171e-05	4	0.000124083	60	0.00014121	0	0.0106383	1
DIo/RC	4000069	9036	14.2026	0.000281906	0.124943	1	0.0141518	97	0.000996428	4	0.00415325	61	0.000143563	0	0.0108156	1
REo/RC	5249530*	14811	14.1126	0.000284322	0.115942	1	0.028284	104	0.00200416	4	0.00887932	62	0.000145917	0	0.0109929	1
TRo/CS	6429874	1959	14.1009	0.000287172	0.104967	1	2339.51	103	165.913	4	1299.77	63	0.00014827	0	0.0111702	1
Fv/Fm	3254763*	12285	14.083	0.000288287	0.11555	1	0.000387203	104	2.74944e-05	4	0.000122886	64	0.000150624	0	0.0113475	1
DIo/RC	3987085*	14868	14.0496	0.000299659	0.123575	1	0.0147844	99	0.0010523	4	0.00386532	65	0.000152977	0	0.0115248	1
REo/RC	4007650	6486	13.895	0.00031905	0.117445	1	0.0285178	101	0.00205238	4	0.00888176	66	0.000155331	0	0.0117021	1
REo/RC	3664665	8082	13.8735	0.000320827	0.115396	1	0.027974	102	0.00201637	4	0.00918687	67	0.000157684	0	0.0118794	1
DIo/RC	3919312*	14274	13.8133	0.000327126	0.116136	1	0.014383	104	0.00104124	4	0.00388913	68	0.000160038	0	0.0120567	1
Fv/Fm	3257700*	16604	13.9287	0.00033217	0.128348	1	0.000365568	90	2.62457e-05	4	0.000121536	69	0.000162391	0	0.012234	1
TRo/RC	3430780*	20172	14.5226	0.000332871	0.180454	1	0.187884	59	0.0129373	4	0.069468	70	0.000164745	0	0.0124113	1
ABS/RC	3912298*	19374	14.8259	0.00033609	0.224405	1	0.234481	50	0.0158156	4	0.0635298	71	0.000167098	0	0.0125887	1
ABS/RC	3912298*	19375	14.8259	0.00033609	0.224405	1	0.234481	50	0.0158156	4	0.0635298	72	0.000169452	0	0.012766	1
TRo/CS	4186396	1654	13.7897	0.000336677	0.105605	1	2340.78	100	169.748	4	1297.67	73	0.000171805	0	0.0129433	1
DIo/CS	5250954*	17180	14.5844	0.000347772	0.196181	1	249.456	54	17.1043	4	86.9817	74	0.000174159	0	0.0131206	1
ABS/RC	3261823	7933	13.7393	0.000353045	0.124351	1	0.284485	95	0.020706	4	0.0801743	75	0.000176512	0	0.0132979	1
DIo/RC	3986869	9284	13.6408	0.000357785	0.116794	1	0.0144072	102	0.00105619	4	0.00390628	76	0.000178866	0	0.0134752	1
DIo/RC	3268128	8934	13.5859	0.000368723	0.11692	1	0.0135523	101	0.000997527	4	0.0037903	77	0.000181219	0	0.0136525	1
DIo/RC	3430780*	20172	14.2556	0.000372994	0.181957	1	0.0154041	59	0.00108057	4	0.00522618	78	0.000183573	0	0.0138298	1
Fv/Fm	5242204	6482	13.531	0.000378346	0.114436	1	0.000371389	101	2.74472e-05	4	0.000118307	79	0.000185926	0	0.0140071	1
REo/RC	3432822	9347	13.4622	0.000387466	0.112035	1	0.0261543	103	0.00194279	4	0.00833515	80	0.00018828	0	0.0141844	1
ABS/CS	6429874	1959	13.4276	0.000393843	0.101078	1	3829.08	103	285.165	4	2127.59	81	0.000190633	0	0.0143617	1
RWC	4186184	13	13.399	0.000402559	0.103749	1	64.6624	101	4.82591	4	33.9609	82	0.000192987	0	0.014539	1
DIo/RC	3267419	2281	13.344	0.000416719	0.117005	1	0.0135804	99	0.00101772	4	0.00382829	83	0.00019534	0	0.0147163	1
DIo/RC	3666258	8397	13.3306	0.000423118	0.119525	1	0.014158	97	0.00106206	4	0.00385795	84	0.000197694	0	0.0148936	1
PIcsm	3432741*	19080	13.2589	0.000424741	0.110026	1	3.4432e+06	104	259689	4	1.07168e+06	85	0.000200047	0	0.0150709	1
ABS/RC	5249862*	20138	13.2477	0.000426991	0.111155	1	0.276892	104	0.0209011	4	0.0793347	86	0.000202401	0	0.0152482	1
TRo/CS	3263589	2393	13.2813	0.000427308	0.105647	1	2209.18	100	166.338	4	1069.31	87	0.000204754	0	0.0154255	1
REo/RC	3254829*	17524	13.2445	0.000427655	0.109615	1	0.0267406	104	0.002019	4	0.00849347	88	0.000207108	0	0.0156028	1
REo/RC	3254829*	17525	13.2445	0.000427655	0.109615	1	0.0267406	104	0.002019	4	0.00849347	89	0.000209461	0	0.0157801	1
DIo/RC	3430642*	18974	14.1824	0.000437771	0.211378	1	0.0171488	50	0.00120916	4	0.00516763	90	0.000211815	0	0.0159574	1
REo/RC	5242711	2102	13.2685	0.000439684	0.118125	1	0.0267189	95	0.00201371	4	0.00872196	91	0.000214168	0	0.0161348	1
ABS/RC	3255461	3874	13.2096	0.000441965	0.114825	1	0.283069	100	0.021429	4	0.0805811	92	0.000216522	0	0.0163121	1
REo/RC	3256435	11166	13.2926	0.000443398	0.118313	1	0.022249	91	0.00167379	4	0.00893451	93	0.000218875	0	0.0164894	1
PIABS	3432741*	19080	13.164	0.000444247	0.110418	1	0.774227	104	0.058814	4	0.223784	94	0.000221229	0	0.0166667	1
DIo/RC	4007194*	14929	13.1844	0.000445364	0.115079	1	0.0131286	101	0.000995769	4	0.00337782	95	0.000223582	0	0.016844	1
DIo/RC	3665113*	14298	13.1552	0.000446107	0.111224	1	0.0137747	104	0.00104709	4	0.00373705	96	0.000225936	0	0.0170213	1
DIo/RC	5249774*	14307	13.1552	0.000446107	0.111224	1	0.0137747	104	0.00104709	4	0.00373705	97	0.000228289	0	0.0171986	1
DIo/RC	5250792*	14384	13.1552	0.000446107	0.111224	1	0.0137747	104	0.00104709	4	0.00373705	98	0.000230643	0	0.0173759	1
Ψo	3811009	8886	13.1882	0.000446438	0.113282	1	0.0109359	100	0.000829215	4	0.00340386	99	0.000232996	0	0.0175532	1
RWC	3664167	5120	13.1533	0.000455781	0.10714	1	3.50502	99	0.266474	4	1.5834	100	0.000235349	0	0.0177305	1
REo/RC	3431571	8777	13.1092	0.00045773	0.10936	1	0.0265363	103	0.00202425	4	0.00853842	101	0.000237703	0	0.0179078	1
REo/RC	3255247*	20236	13.13	0.000458859	0.111859	1	0.027078	100	0.0020623	4	0.00896066	102	0.000240056	0	0.0180851	1
ABS/RC	3430642*	18974	13.9887	0.000474323	0.204992	1	0.321996	50	0.0230183	4	0.104964	103	0.00024241	0	0.0182624	1
TRo/CS	3266383	1324	13.0621	0.000475792	0.103515	1	2299.22	99	176.022	4	1196.32	104	0.000244763	0	0.0184397	1
Fv/Fm	3255051	4542	13.0105	0.000481524	0.109588	1	0.000361636	102	2.77957e-05	4	0.000116203	105	0.000247117	0	0.018617	1
RWC	5249882*	16118	13.389	0.000486796	0.156492	1	47.5224	70	3.54936	4	13.8047	106	0.00024947	0	0.0187943	1
RWC	5249882*	16119	13.389	0.000486796	0.156492	1	47.5224	70	3.54936	4	13.8047	107	0.000251824	0	0.0189716	1
PIABS	3267419	2281	13.0106	0.000487475	0.114281	1	0.733879	99	0.0564061	4	0.209379	108	0.000254177	0	0.0191489	1
RC/CSm	3266186	6874	12.9701	0.00049081	0.103062	1	28643	102	2208.38	4	13166	109	0.000256531	0	0.0193262	1
DIo/CS	3256262*	12135	12.9446	0.000492914	0.101581	1	269.46	104	20.8163	4	121.944	110	0.000258884	0	0.0195035	1
DIo/CS	3256262*	12134	12.9446	0.000492914	0.101581	1	269.46	104	20.8163	4	121.944	111	0.000261238	0	0.0196809	1
ABS/CS	4186396	1654	12.9531	0.000498806	0.100413	1	3796.52	100	293.098	4	2124.86	112	0.000263591	0	0.0198582	1
DIo/RC	3987011	10586	12.9259	0.000501207	0.111138	1	0.0136618	102	0.00105693	4	0.00377979	113	0.000265945	0	0.0200355	1
TRo/RC	5249862*	20138	12.8684	0.000511097	0.107968	1	0.172513	104	0.013406	4	0.0508982	114	0.000268298	0	0.0202128	1
DIo/CS	3256160*	13020	12.8392	0.000518221	0.100844	1	267.507	104	20.8351	4	121.455	115	0.000270652	0	0.0203901	1
DIo/CS	3256160*	13021	12.8392	0.000518221	0.100844	1	267.507	104	20.8351	4	121.455	116	0.000273005	0	0.0205674	1
DIo/RC	11295061*	18554	13.568	0.000519784	0.174686	1	0.0124838	56	0.000920096	4	0.00498472	117	0.000275359	0	0.0207447	1
DIo/RC	11295061*	18555	13.568	0.000519784	0.174686	1	0.0124838	56	0.000920096	4	0.00498472	118	0.000277712	0	0.020922	1
DIo/CS	3255896*	12212	12.8377	0.000520585	0.101705	1	269.787	103	21.0153	4	122.019	119	0.000280066	0	0.0210993	1
DIo/CS	3255896*	12213	12.8377	0.000520585	0.101705	1	269.787	103	21.0153	4	122.019	120	0.000282419	0	0.0212766	1
PIcsm	3267419	2281	12.8529	0.000525159	0.110911	1	3.24669e+06	99	252604	4	1.06629e+06	121	0.000284773	0	0.0214539	1
Fv/Fm	5250973	7228	12.8479	0.000537957	0.114571	1	0.00035464	94	2.7603e-05	4	0.000125175	122	0.000287126	0	0.0216312	1
ETo/CS	7232846	8057	12.7559	0.00054327	0.104827	1	1477.97	102	115.865	4	570.22	123	0.00028948	0	0.0218085	1
ABS/RC	3271792	3589	12.7674	0.000544592	0.111886	1	0.255665	100	0.0200248	4	0.0706429	124	0.000291833	0	0.0219858	1
ABS/RC	3266186	6874	12.7401	0.000547373	0.109041	1	0.270169	102	0.0212062	4	0.0786598	125	0.000294187	0	0.0221631	1
Ψo	5240461	1008	12.7719	0.000552589	0.114649	1	0.0100667	96	0.000788185	4	0.00303468	126	0.00029654	0	0.0223404	1
DIo/RC	3665113	8251	12.7804	0.0005528	0.117187	1	0.0139208	95	0.00108923	4	0.00382875	127	0.000298894	0	0.0225177	1
REo/RC	3396768	3019	12.7128	0.000554507	0.107289	1	0.0259029	102	0.00203754	4	0.00840053	128	0.000301247	0	0.022695	1
Fv/Fm	3263879	9699	12.6969	0.000556605	0.106302	1	0.000350034	103	2.75685e-05	4	0.000113314	129	0.000303601	0	0.0228723	1
ABS/CS	3397434	780	12.738	0.000556771	0.103119	1	3549.79	98	278.678	4	1778.45	130	0.000305954	0	0.0230496	1
DIo/RC	5250695*	12723	12.6996	0.000558006	0.110119	1	0.0127962	102	0.0010076	4	0.00335697	131	0.000308308	0	0.023227	1
ETo/CS	4174101	7126	12.7306	0.000561055	0.106793	1	1432.73	97	112.542	4	624.857	132	0.000310661	0	0.0234043	1
TRo/RC	3255461	3874	12.6336	0.000580274	0.11004	1	0.173286	100	0.0137164	4	0.0507819	133	0.000313015	0	0.0235816	1
TRo/CS	3255724*	19709	12.6012	0.000580389	0.0954593	1	2154.04	104	170.939	4	1196.83	134	0.000315368	0	0.0237589	1
φEo	3987102*	13628	12.6001	0.000580697	0.105585	1	0.00697944	104	0.00055392	4	0.00212379	135	0.000317722	0	0.0239362	1
PIABS	3430520	401	12.6168	0.000582625	0.109143	1	0.72093	101	0.0571404	4	0.208553	136	0.000320075	0	0.0241135	1
RWC	5246877	8953	12.6563	0.000583559	0.0992041	1	58.6701	96	4.63563	4	36.5969	137	0.000322429	0	0.0242908	1
TRo/CS	3397434	780	12.6213	0.000588362	0.101502	1	2050.06	98	162.429	4	1069.83	138	0.000324782	0	0.0244681	1
PIcso	3432741*	19080	12.5401	0.000597551	0.104731	1	112790	104	8994.37	4	35385.8	139	0.000327136	0	0.0246454	1
REo/RC	3256708*	18957	12.4959	0.000612525	0.10498	1	0.0255965	103	0.0020484	4	0.00820925	140	0.000329489	0	0.0248227	1
REo/RC	3256708*	18956	12.4959	0.000612525	0.10498	1	0.0255965	103	0.0020484	4	0.00820925	141	0.000331843	0	0.025	1
PIABS	3272818	405	12.5091	0.000613237	0.108325	1	0.742976	101	0.0593947	4	0.214979	142	0.000334196	0	0.0251773	1
RWC	3263757	6571	12.4861	0.000617665	0.0969266	1	60.8362	102	4.87232	4	32.669	143	0.00033655	0	0.0253546	1
TRo/CS	3255198*	20550	12.6041	0.000620545	0.110896	1	2375.9	88	188.503	4	1209.1	144	0.000338903	0	0.0255319	1
REo/RC	3434303	3323	12.5127	0.00062195	0.111175	1	0.0249912	97	0.00199726	4	0.00776436	145	0.000341257	0	0.0257092	1
DIo/RC	5246472	4034	12.4317	0.0006339	0.107721	1	0.0132221	102	0.00106359	4	0.00356459	146	0.00034361	0	0.0258865	1
TRo/RC	3271792	3589	12.4303	0.000639104	0.109117	1	0.159277	100	0.0128136	4	0.0445839	147	0.000345964	0	0.0260638	1
REo/RC	3268211	8730	12.4422	0.000643084	0.111341	1	0.024801	97	0.0019933	4	0.00734948	148	0.000348317	0	0.0262411	1
PIcsm	3431743	7321	12.3766	0.000646076	0.103483	1	3.23844e+06	104	261658	4	1.02049e+06	149	0.000350671	0	0.0264184	1
ABS/RC	3430642*	18975	13.2388	0.000648904	0.196303	1	0.308347	50	0.0232912	4	0.101552	150	0.000353024	0	0.0265957	1
DIo/CS	3930269	5634	12.5092	0.000651928	0.113469	1	272.555	87	21.7884	4	126.611	151	0.000355378	0	0.026773	1
DIo/RC	3922771*	14412	12.354	0.000653119	0.10517	1	0.0130248	104	0.0010543	4	0.00354959	152	0.000357731	0	0.0269504	1
DIo/RC	4169393*	14416	12.354	0.000653119	0.10517	1	0.0130248	104	0.0010543	4	0.00354959	153	0.000360085	0	0.0271277	1
DIo/RC	4169393*	14548	12.354	0.000653119	0.10517	1	0.0130248	104	0.0010543	4	0.00354959	154	0.000362438	0	0.027305	1
DIo/RC	3665113*	14299	12.354	0.000653119	0.10517	1	0.0130248	104	0.0010543	4	0.00354959	155	0.000364792	0	0.0274823	1
DIo/RC	5249774*	14306	12.354	0.000653119	0.10517	1	0.0130248	104	0.0010543	4	0.00354959	156	0.000367145	0	0.0276596	1
DIo/RC	3922771*	14413	12.354	0.000653119	0.10517	1	0.0130248	104	0.0010543	4	0.00354959	157	0.000369499	0	0.0278369	1
DIo/RC	4169393*	14417	12.354	0.000653119	0.10517	1	0.0130248	104	0.0010543	4	0.00354959	158	0.000371852	0	0.0280142	1
φRo	3264659	6911	12.4354	0.000653329	0.113951	1	0.00420274	94	0.000337967	4	0.00127832	159	0.000374206	0	0.0281915	1
ETo/RC	4186428	3624	12.3887	0.000665078	0.10952	1	0.0325571	95	0.00262797	4	0.0119032	160	0.000376559	0	0.0283688	1
DIo/RC	3255461	3874	12.345	0.000665595	0.108998	1	0.0134017	100	0.0010856	4	0.00359849	161	0.000378913	0	0.0285461	1
PIcsm	4791163	11150	12.434	0.000665596	0.117766	1	3.04505e+06	90	244898	4	954002	162	0.000381266	0	0.0287234	1
PIcsm	3430520	401	12.3328	0.000666982	0.106107	1	3.11499e+06	101	252579	4	961667	163	0.00038362	0	0.0289007	1
DIo/RC	3662131	8132	12.3545	0.000667743	0.111427	1	0.012611	98	0.00102076	4	0.00328554	164	0.000385973	0	0.029078	1
ABS/CS	3263589	2393	12.3342	0.000669036	0.099317	1	3542.59	100	287.218	4	1736.95	165	0.000388327	0	0.0292553	1
DIo/RC	4007194*	14928	12.3246	0.00066957	0.10839	1	0.0123656	101	0.00100332	4	0.00318706	166	0.00039068	0	0.0294326	1
DIo/CS	100005899*	12691	12.3126	0.000670962	0.0987935	1	260.796	102	21.1813	4	119.83	167	0.000393034	0	0.0296099	1
RWC	3261348*	18564	12.3596	0.000671521	0.105533	1	2.90408	96	0.234966	4	1.24036	168	0.000395387	0	0.0297872	1
ABS/RC	3267419	2281	12.3255	0.00067439	0.107465	1	0.252961	99	0.0205235	4	0.0805169	169	0.000397741	0	0.0299645	1
REo/RC	3987061	8723	12.3336	0.000677093	0.108733	1	0.026056	97	0.0021126	4	0.00867732	170	0.000400094	0	0.0301418	1
TRo/CS	4007134*	19775	12.2665	0.000681056	0.093191	1	2102.85	104	171.431	4	1184.04	171	0.000402448	0	0.0303191	1
TRo/CS	5244070*	19798	12.2665	0.000681056	0.093191	1	2102.85	104	171.431	4	1184.04	172	0.000404801	0	0.0304965	1
TRo/CS	3255724*	19708	12.2665	0.000681056	0.093191	1	2102.85	104	171.431	4	1184.04	173	0.000407155	0	0.0306738	1
TRo/CS	3256111*	19774	12.2665	0.000681056	0.093191	1	2102.85	104	171.431	4	1184.04	174	0.000409508	0	0.0308511	1
TRo/CS	5244070*	19799	12.2665	0.000681056	0.093191	1	2102.85	104	171.431	4	1184.04	175	0.000411862	0	0.0310284	1
TRo/RC	3912298*	19374	13.1235	0.000681226	0.204594	1	0.137545	50	0.0104808	4	0.0370601	176	0.000414215	0	0.0312057	1
TRo/RC	3912298*	19375	13.1235	0.000681226	0.204594	1	0.137545	50	0.0104808	4	0.0370601	177	0.000416569	0	0.031383	1
ABS/RC	3257387*	14796	12.2648	0.000681592	0.103777	1	0.258515	104	0.0210778	4	0.0747404	178	0.000418922	0	0.0315603	1
PIcsm	3272818	405	12.278	0.000684633	0.105148	1	3.21501e+06	101	261851	4	1.03224e+06	179	0.000421276	0	0.0317376	1
Fv/Fm	3430281	3753	12.2866	0.000686993	0.107493	1	0.000349379	99	2.84358e-05	4	0.000108772	180	0.000423629	0	0.0319149	1
ABS/RC	3430780*	20173	12.8286	0.000691608	0.163549	1	0.268442	59	0.0209252	4	0.101692	181	0.000425983	0	0.0320922	1
REo/RC	3265926	3095	12.2602	0.000693057	0.105998	1	0.0235141	100	0.00191792	4	0.00751078	182	0.000428336	0	0.0322695	1
ABS/CS	3266383	1324	12.2528	0.000698125	0.0981095	1	3712.99	99	303.031	4	1961.31	183	0.00043069	0	0.0324468	1
Fv/Fm	3256262*	12134	12.2006	0.000702891	0.101727	1	0.000340881	104	2.79398e-05	4	0.000111306	184	0.000433043	0	0.0326241	1
Fv/Fm	3256262*	12135	12.2006	0.000702891	0.101727	1	0.000340881	104	2.79398e-05	4	0.000111306	185	0.000435397	0	0.0328014	1
ABS/CS	3255198*	20550	12.3284	0.000706068	0.109424	1	3962.93	88	321.447	4	1982.23	186	0.00043775	0	0.0329787	1
REo/RC	3396887	2310	12.2329	0.00071026	0.108322	1	0.0245071	97	0.00200337	4	0.00797905	187	0.000440104	0	0.033156	1
RWC	3432385*	15852	12.1754	0.000711432	0.0965569	1	3.26939	104	0.268524	4	1.48329	188	0.000442457	0	0.0333333	1
RWC	3986615	7942	12.1532	0.000729341	0.0948852	1	59.4676	100	4.89315	4	34.3544	189	0.000444811	0	0.0335106	1
PItotal	3268157	10485	12.2206	0.000729393	0.112269	1	0.967638	92	0.0791809	4	0.333563	190	0.000447164	0	0.0336879	1
ABS/RC	3987085*	14869	12.1575	0.000730577	0.108078	1	0.261453	99	0.0215055	4	0.072516	191	0.000449518	0	0.0338652	1
RWC	3260853*	13042	12.1022	0.000736838	0.0960373	1	3.25179	104	0.268694	4	1.47889	192	0.000451871	0	0.0340426	1
RWC	3260853*	13043	12.1022	0.000736838	0.0960373	1	3.25179	104	0.268694	4	1.47889	193	0.000454225	0	0.0342199	1
TRo/RC	3430642*	18974	12.9148	0.00074405	0.19176	1	0.190527	50	0.0147525	4	0.0639858	194	0.000456578	0	0.0343972	1
PItotal	3265579	10636	12.123	0.000754364	0.108691	1	1.00953	95	0.083274	4	0.344268	195	0.000458932	0	0.0345745	1
ABS/CS	3255724*	19709	12.0518	0.000754909	0.0922321	1	3539.58	104	293.698	4	1958.08	196	0.000461285	0	0.0347518	1
Fv/Fm	3255896*	12213	12.0537	0.000756787	0.101509	1	0.000340035	103	2.821e-05	4	0.00011104	197	0.000463639	0	0.0349291	1
Fv/Fm	3255896*	12212	12.0537	0.000756787	0.101509	1	0.000340035	103	2.821e-05	4	0.00011104	198	0.000465992	0	0.0351064	1
REo/RC	4194507	8956	12.0922	0.000762427	0.107114	1	0.0223888	96	0.00185151	4	0.00781855	199	0.000468345	0	0.0352837	1
ETo/RC	3271064	2221	12.0431	0.000766008	0.103952	1	0.0321564	101	0.00267012	4	0.00991399	200	0.000470699	0	0.035461	1
DIo/RC	3255409	8478	12.0457	0.000773522	0.108696	1	0.0126674	98	0.00105161	4	0.00337053	201	0.000473052	0	0.0356383	1
REo/RC	3432320*	15043	12.0445	0.000773971	0.106148	1	0.0254891	98	0.00211625	4	0.008184	202	0.000475406	0	0.0358156	1
ABS/RC	5249861*	14368	12.4148	0.000778847	0.152352	1	0.243334	66	0.0196004	4	0.0758883	203	0.000477759	0	0.0359929	1
ABS/RC	5249861*	14369	12.4148	0.000778847	0.152352	1	0.243334	66	0.0196004	4	0.0758883	204	0.000480113	0	0.0361702	1
RWC	3274243	337	12.0109	0.000786482	0.0982382	1	60.6316	98	5.04805	4	30.6201	205	0.000482466	0	0.0363475	1
TRo/RC	3264700	1258	11.9651	0.000789671	0.102091	1	0.163038	103	0.0136261	4	0.0483747	206	0.00048482	0	0.0365248	1
PIcsm	3664422	11305	11.9609	0.000791265	0.101266	1	3.15494e+06	103	263771	4	996649	207	0.000487173	0	0.0367021	1
Fv/Fm	3269029	7361	11.98	0.000792332	0.104862	1	0.000339711	100	2.83565e-05	4	0.000100985	208	0.000489527	0	0.0368794	1
DIo/CS	3254784*	12286	11.9481	0.000793491	0.0945659	1	250.853	104	20.9953	4	117.292	209	0.00049188	0	0.0370567	1
DIo/RC	3269285	4137	11.966	0.000797659	0.105758	1	0.0129391	100	0.00108132	4	0.00355358	210	0.000494234	0	0.037234	1
ETo/RC	3266021	2387	11.9479	0.000804608	0.103467	1	0.032093	100	0.00268608	4	0.0103923	211	0.000496587	0	0.0374113	1
φEo	3811009	8886	11.9462	0.000805277	0.103475	1	0.00663715	100	0.000555589	4	0.00214588	212	0.000498941	0	0.0375887	1
REo/RC	3262177	1916	11.9861	0.000811629	0.109558	1	0.021108	93	0.00176103	4	0.00722237	213	0.000501294	0	0.037766	1
RWC	3261348*	18565	11.9595	0.000812198	0.102495	1	2.82048	96	0.235837	4	1.21946	214	0.000503648	0	0.0379433	1
PItotal	5249862*	20139	11.8565	0.000829232	0.0995292	1	0.965442	104	0.0814272	4	0.307915	215	0.000506001	0	0.0381206	1
REo/RC	3256965*	18676	11.8483	0.000832513	0.0992419	1	0.0242101	104	0.00204334	4	0.00786084	216	0.000508355	0	0.0382979	1
REo/RC	3256965*	18677	11.8483	0.000832513	0.0992419	1	0.0242101	104	0.00204334	4	0.00786084	217	0.000510708	0	0.0384752	1
Ψo	3987102*	13628	11.848	0.000832643	0.100178	1	0.00993904	104	0.00083888	4	0.00299262	218	0.000513062	0	0.0386525	1
RC/CSm	5251639	6585	11.8753	0.000836069	0.0972873	1	25825.2	99	2174.7	4	12539.6	219	0.000515415	0	0.0388298	1
PItotal	3263907	11595	11.8281	0.000846266	0.100822	1	0.967078	102	0.0817608	4	0.313073	220	0.000517769	0	0.0390071	1
PIABS	3431743	7321	11.8115	0.000847419	0.10023	1	0.702792	104	0.0595008	4	0.205925	221	0.000520122	0	0.0391844	1
REo/RC	6281640	4880	11.7755	0.000865089	0.0992784	1	0.0232473	103	0.00197421	4	0.00770459	222	0.000522476	0	0.0393617	1
Fv/Fm	5256755	4420	11.7885	0.000865494	0.100889	1	0.000336628	101	2.85556e-05	4	0.000113125	223	0.000524829	0	0.039539	1
WC	5249466	8984	11.7795	0.000866318	0.0908374	1	5.59799	102	0.475234	4	3.28817	224	0.000527183	0	0.0397163	1
ABS/RC	5249862*	20139	11.7638	0.000867097	0.0999694	1	0.249029	104	0.021169	4	0.0723689	225	0.000529536	0	0.0398936	1
PItotal	3923520	11295	11.7705	0.000867164	0.0997666	1	0.937728	103	0.0796677	4	0.29836	226	0.00053189	0	0.0400709	1
RC/CSm	3261390*	12930	12.2514	0.000867208	0.150362	1	26729.2	62	2181.72	4	10624.9	227	0.000534243	0	0.0402482	1
DIo/RC	5249862*	20139	11.7434	0.000875682	0.100499	1	0.0124464	104	0.00105986	4	0.00340499	228	0.000536597	0	0.0404255	1
Fv/Fm	5250954*	17180	12.3989	0.000881858	0.177427	1	0.000358912	54	2.89471e-05	4	0.000114933	229	0.00053895	0	0.0406028	1
DIo/RC	3916007	9001	11.7384	0.000883595	0.102016	1	0.0124153	102	0.00105767	4	0.00345457	230	0.000541304	0	0.0407801	1
RWC	4197350	124	11.7612	0.000886236	0.0989701	1	3.29234	98	0.279932	4	1.45819	231	0.000543657	0	0.0409574	1
DIo/RC	3663807	9292	11.7218	0.000890671	0.101862	1	0.0125342	102	0.0010693	4	0.00349543	232	0.000546011	0	0.0411348	1
Fv/Fm	3270240	9013	11.7073	0.000896926	0.0994692	1	0.000326174	102	2.78607e-05	4	0.000109339	233	0.000548364	0	0.0413121	1
ABS/RC	3275548	8402	11.7428	0.000897384	0.106454	1	0.247809	97	0.0211031	4	0.0702143	234	0.000550718	0	0.0414894	1
REo/RC	3276620	3395	11.7767	0.000900288	0.111183	1	0.0233357	92	0.00198152	4	0.00689622	235	0.000553071	0	0.0416667	1
φEo	5240461	1008	11.7435	0.000900403	0.106029	1	0.0062061	96	0.000528469	4	0.0019498	236	0.000555425	0	0.041844	1
ABS/RC	3987044	8682	11.6979	0.00090102	0.10127	1	0.25095	102	0.0214526	4	0.0724666	237	0.000557778	0	0.0420213	1
REo/RC	5248671	3182	11.7033	0.00090169	0.10029	1	0.0231564	101	0.00197862	4	0.00776361	238	0.000560132	0	0.0421986	1
PIcso	3430520	401	11.702	0.000902246	0.101335	1	102145	101	8728.85	4	31595.1	239	0.000562485	0	0.0423759	1
TRo/RC	3261823	7933	11.7287	0.000910258	0.107778	1	0.158537	95	0.0135171	4	0.0467101	240	0.000564839	0	0.0425532	1
Ψo	3929562	326	11.6909	0.000916623	0.104522	1	0.00975428	98	0.000834347	4	0.00288921	241	0.000567192	0	0.0427305	1
PIABS	3986540	1411	11.6695	0.000919633	0.102788	1	0.709191	100	0.0607732	4	0.205558	242	0.000569546	0	0.0429078	1
PIABS	3912880	1892	11.6632	0.000922383	0.102944	1	0.679291	100	0.058242	4	0.193614	243	0.000571899	0	0.0430851	1
ABS/CS	3255724*	19708	11.6357	0.000922408	0.0893684	1	3429.68	104	294.755	4	1930.6	244	0.000574253	0	0.0432624	1
ABS/CS	3256111*	19774	11.6357	0.000922408	0.0893684	1	3429.68	104	294.755	4	1930.6	245	0.000576606	0	0.0434397	1
ABS/CS	3256111*	19775	11.6357	0.000922408	0.0893684	1	3429.68	104	294.755	4	1930.6	246	0.00057896	0	0.043617	1
ABS/CS	5244070*	19798	11.6357	0.000922408	0.0893684	1	3429.68	104	294.755	4	1930.6	247	0.000581313	0	0.0437943	1
ABS/CS	5244070*	19799	11.6357	0.000922408	0.0893684	1	3429.68	104	294.755	4	1930.6	248	0.000583667	0	0.0439716	1
ETo/RC	3664062	9220	11.6454	0.000927189	0.100505	1	0.0313549	101	0.00269247	4	0.0100082	249	0.00058602	0	0.0441489	1
PItotal	3664826	1855	11.6364	0.000928124	0.0996517	1	0.964949	102	0.0829254	4	0.306207	250	0.000588374	0	0.0443262	1
REo/RC	3987276	3841	11.6441	0.000930902	0.101268	1	0.0231664	100	0.00198953	4	0.00745252	251	0.000590727	0	0.0445035	1
ABS/RC	3274753	8442	11.613	0.000935595	0.0996795	1	0.24714	103	0.0212814	4	0.0718406	252	0.000593081	0	0.0446809	1
RWC	3259601*	21110	11.603	0.000937081	0.0878253	1	57.297	104	4.9381	4	34.7088	253	0.000595434	0	0.0448582	1
WC	3258001*	13381	11.5972	0.000939721	0.0877215	1	5.47549	104	0.472138	4	3.32917	254	0.000597788	0	0.0450355	1
WC	3258001*	13380	11.5972	0.000939721	0.0877215	1	5.47549	104	0.472138	4	3.32917	255	0.000600141	0	0.0452128	1
Fv/Fm	3272544	8404	11.6432	0.000941254	0.10421	1	0.000337827	97	2.90151e-05	4	0.000106832	256	0.000602495	0	0.0453901	1
TRo/RC	100005767*	20745	11.5924	0.000941927	0.0983359	1	0.157122	104	0.013554	4	0.0470506	257	0.000604848	0	0.0455674	1
REo/RC	3275533	9886	11.6102	0.000943009	0.099626	1	0.0231558	101	0.00199443	4	0.00774746	258	0.000607202	0	0.0457447	1
RWC	5256825*	12531	11.5887	0.000943588	0.0877278	1	57.2334	104	4.93871	4	34.6929	259	0.000609555	0	0.045922	1
RWC	3254684*	17338	11.5887	0.000943588	0.0877278	1	57.2334	104	4.93871	4	34.6929	260	0.000611909	0	0.0460993	1
RWC	3254684*	17339	11.5887	0.000943588	0.0877278	1	57.2334	104	4.93871	4	34.6929	261	0.000614262	0	0.0462766	1
Fv/Fm	4170248*	15717	12.0929	0.000947929	0.152873	1	0.000285678	60	2.36237e-05	4	0.000112825	262	0.000616616	0	0.0464539	1
DIo/RC	5249862*	20138	11.5791	0.000947971	0.0992343	1	0.0122897	104	0.00106137	4	0.00336582	263	0.000618969	0	0.0466312	1
REo/RC	3263490	4939	11.5906	0.00095517	0.100656	1	0.0226636	100	0.00195534	4	0.00740663	264	0.000621323	0	0.0468085	1
PIcso	3272818	405	11.5808	0.000956496	0.0999051	1	105806	101	9136.33	4	34073.2	265	0.000623676	0	0.0469858	1
DIo/RC	3916724*	13170	11.5596	0.000956971	0.0990836	1	0.0122711	104	0.00106155	4	0.00336116	266	0.00062603	0	0.0471631	1
ABS/RC	3664826	1855	11.5674	0.000959494	0.100372	1	0.249417	102	0.021562	4	0.0714019	267	0.000628383	0	0.0473404	1
RWC	3985330	504	11.5612	0.000962382	0.0886578	1	57.3477	102	4.96036	4	35.2217	268	0.000630737	0	0.0475177	1
REo/RC	3271906	8650	11.5904	0.000968905	0.105091	1	0.024376	96	0.00210312	4	0.007513	269	0.00063309	0	0.047695	1
ABS/RC	5255890	8662	11.5402	0.000972167	0.0999722	1	0.247853	102	0.0214773	4	0.0721341	270	0.000635444	0	0.0478723	1
RWC	3259847*	16762	11.5238	0.000973659	0.0872856	1	56.945	104	4.94149	4	34.6208	271	0.000637797	0	0.0480496	1
REo/RC	3809765	2801	11.569	0.000975351	0.102983	1	0.023078	97	0.00199482	4	0.00764957	272	0.000640151	0	0.048227	1
φEo	3929562	326	11.5614	0.000975446	0.103302	1	0.00643024	98	0.000556183	4	0.00193527	273	0.000642504	0	0.0484043	1
DIo/RC	3664826	1855	11.5234	0.000980089	0.100551	1	0.0124466	102	0.00108012	4	0.00340327	274	0.000644858	0	0.0485816	1
RWC	7576251	4620	11.5342	0.000981501	0.0977691	1	45.7469	100	3.96621	4	17.8218	275	0.000647211	0	0.0487589	1
DIo/RC	3910532	8396	11.5532	0.000982759	0.105568	1	0.0127014	97	0.00109939	4	0.00341879	276	0.000649565	0	0.0489362	1
REo/RC	5250546	4423	11.5184	0.000985719	0.0983494	1	0.0227779	101	0.00197753	4	0.00796778	277	0.000651918	0	0.0491135	1
DIo/CS	3430281	3753	11.5306	0.000986569	0.0977963	1	235.908	99	20.4594	4	96.6904	278	0.000654272	0	0.0492908	1
RWC	3274277	5342	11.5302	0.000990187	0.0953834	1	3.14775	98	0.273001	4	1.56172	279	0.000656625	0	0.0494681	1
ABS/RC	4790017	3380	11.491	0.000992381	0.0991634	1	0.230777	103	0.0200833	4	0.0646653	280	0.000658979	0	0.0496454	1
Fv/Fm	3910624	3672	11.494	0.00099737	0.098982	1	0.00031995	101	2.78363e-05	4	0.000105235	281	0.000661332	0	0.0498227	1
ABS/RC	3264700	1258	11.4783	0.000998509	0.0986582	1	0.245707	103	0.0214063	4	0.0714101	282	0.000663686	0	0.05	1
