# Supplementary material for: Genome-Wide Associations of Chlorophyll Fluorescence OJIP Transient Parameters Connected With Soil Drought Response in Barley
Source: Front Plant Sci. 2019 Feb 11;10:78. doi: 10.3389/fpls.2019.00078 (PMC6384533; doi:10.3389/fpls.2019.00078)
Supplement: Supplementary Table S8 — Sequences and related data from NCBI, Gene Bank (protein ID) and IPK Barley databases for markers associated with at least two physiological traits in barley plants under drought with exception to the markers associated only with chlorophyll fluorescence parameters. Markers indicated in green are included in Table 6. [file Table_8.XLSX]

## Sheet: Multi_trait_drought
Marker/ * SNP marker	Traits	Sequence	NCBI (identified similarity of marker sequence, QC - query cover[%]/ Id- Identity [%]), nulcleotide positions of similarity region, gene Accession number	Gene Bank (protein ID)	IPK Barley (similarity of marker sequences to barley genes )
3255929	ETo/RC RWC TRo/RC WUE	TGCAGAAGCTGAAGCGTGTTGTACAGAATCAGATTGCACGATTCTGCATGCATGGCGTTTGCTTGGAAG			> AK365895 MLOC_45887 POPSEQ: contig: morex_contig_282757 chr: 2 cM: 5.52407932011331 BLAST2GO: protein kinase domain containing protein, Length=1560, 1363-1398 nt of sequence
3256062	ABS/RC ETo/RC TRo/RC WUE	TGCAGGGTGCTGCGTCAAGTTAAACGGGAAGGACCGTCCG	Hordeum vulgare subsp. vulgare mRNA for predicted protein, partial cds, clone: NIASHv2014K01, 100%/100% AK363343.1, 1460-1499 nt of mRNA (cds region)	BAJ94547.1	> AK363343 BLAST2GO: protein kinase domain containing protein Length=1569, 1413-1452 nt of sequence
3256392	ABS/RC ETo/RC TRo/RC WUE	TGCAGCTTTGGATGTGGAGACGGTTCAACTCTCTTGGAGTCCTCTGTTACAAGGAAATTGTAGATTCGT	Hordeum vulgare subsp. vulgare mRNA for predicted protein, partial cds, clone: NIASHv2014K01, 100%/100% AK363343.1, 508-440 nt of sequence (out of cds)	BAJ94547.1	> AK363343 BLAST2GO: protein kinase domain containing protein Length=1569, 461-393 nt of sequence
3263978	ABS/RC ETo/RC TRo/RC WUE	TGCAGCGCTGCATAGGAGCTCCTCACTCTAAGCGTAGACCAACTCCAAGAAGACCG			> MLOC_11770.1 MLOC_11770 POPSEQ: contig: morex_contig_1561797 chr: 7 cM: 54.3909348441926 BLAST2GO: sucrose synthase Length=2424, 1657-1622nt of sequence
3266919	ETo/RC RWC Tro/RC	TGCAGCGTCCACATTGATTTTCATGAGACCTAGTGGTGGAGCAATCCAGCGCGCCG	Hordeum vulgare subsp. vulgare mRNA for predicted protein, complete cds, clone: NIASHv2138K18, 100%/100% AK371623.1, 153-191 nt of mRNA, (out of cds)	BAK02821.1
3267465	ABS/RC ETo/RC TRo/RC WUE	TGCAGCCCATTAGCCGACAGTTCCTTTAGCCGTCGTATTGCAACTCTTTCCACGGGGCCAATGCCGAGA	PREDICTED: Aegilops tauschii subsp. tauschii putative amidase C869.01 (LOC109752483), mRNA, 92%/94%, XM_020311368.1, 1323-1260 nt of mRNA (cds region)	XP_020166957.1	> AK369875 MLOC_1974 POPSEQ: contig: morex_contig_117571 chr: 1 cM: 47.8277258418858 BLAST2GO: retrotransposon line subclass, Length=1023, 527-506 nt of sequence
3268244	ABS/RC ETo/RC TRo/RC WUE	TGCAGTTTTCACGTTGTGTTTCATTAAAAATATTTTAATATCTCTGCCG			> MLOC_23781.1 MLOC_23781 POPSEQ: contig: morex_contig_162954 chr: 2 cM: 2.26628895184136 BLAST2GO: probable disease resistance rpp8-like protein 4-like Length=282, 244-185 nt of sequence
3268875	RWC TRo/RC WUE	TGCAGTACTGTTTTAGCTCCTCGCTGCATTCATAGACAAATAGCTTTTCCAGTGAATCCG			> MLOC_23781.1 MLOC_23781 POPSEQ: contig: morex_contig_162954 chr: 2 cM: 2.26628895184136 BLAST2GO: probable disease resistance rpp8-like protein 4-like Length=282, 244-185 nt of sequence
3268955	ABS/RC ETo/RC TRo/RC	TGCAGAAGCCTGAAGCCGACGTTGGAGGAGGCGAGCTGCGTGTCGACGGAGGCCTGCTCCAGCCCCTCC	PREDICTED: Aegilops tauschii subsp. tauschii G patch domain-containing protein 8 (LOC109751679), mRNA, 100%/96%, XM_020310566.1, 287-219nt of mRNA (cds region)	XP_020166155.1	> MLOC_58838.5 MLOC_58838 POPSEQ: contig: morex_contig_43044 chr: 2 cM: 2.19546742209632 BLAST2GO: 1054192 d111 g-patch domain-containing protein Length=927, 236-168 nt of sequence
3269335	RWC TRo/RC WUE	TGCAGCACGCACCACCACCAGTAAGTCCGACACCACCACCTCCCCCAACTGGTACCTTGGCATATGGTT	PREDICTED: Aegilops tauschii subsp. tauschii G-type lectin S-receptor-like serine/threonine-protein kinase At2g19130 (LOC109785319), mRNA, 100%/97%, XM_020343916.1, 175-243nt of mRNA (cds region)	XP_020199505.1	> MLOC_4317.1 MLOC_4317 POPSEQ: contig: morex_contig_135011 chr: 2 cM: 5.52407932011331 BLAST2GO: s-domain receptor-like protein kinase Length=2481, 168-236 nt of sequence
3269712	RWC WUE	TGCAGATCAATTCACGCGCCATCTCAAGGCTGGCCACGATGTCTGATATGAGCGGCCG			> AK363152 BLAST2GO: protein kinase domain containing protein Length=1638, 1492-1435 nt of sequence
3269714	RWC WUE	TGCAGCAGAGACAGAAGAGAACAGATCAGTACAGTACACAGCAAGCACGTCGGCCTCCTCACTCGGCTA	Hordeum vulgare subsp. vulgare mRNA for predicted protein, partial cds, clone: NIASHv1102K12 88% 83% AK359767.1, 311-246 mRNA, (cds region)	BAJ90976.1	> MLOC_13737.2 MLOC_13737 POPSEQ: contig: morex_contig_1566369 chr: 1 cM: 3.18696883852691 BLAST2GO: receptor protein kinase-like protein Length=3135, 2951-2977 nt of sequence
3271015	RWC WUE	TGCAGATCAACTCGTGCGCCATCTGAAGGTTGGCAACAATATCTGATATGGCCG	PREDICTED: Aegilops tauschii subsp. tauschii probable receptor-like serine/threonine-protein kinase At4g34500 (LOC109752468), mRNA 100%/91%, XM_020311359.1 1855-1802 nt of sequence (cds region)	XP_020166948.1	> AK363152 BLAST2GO: protein kinase domain containing protein Length=1638, 1492-1439 nt
3271630	RWC TRo/RC WUE	TGCAGTTCCTAAGGCTTATGGGTGTTAAAGGCATGGGGACGCTGGAGCCCCTCTCAAACCTCTCCTCTC	PREDICTED: Brachypodium distachyon putative disease resistance protein RGA3 (LOC106865841), mRNA 60%/98% XM_024456923.1, 4005-4046 nt of sequence (cds region)	XP_024312691.1	> MLOC_68129.3 MLOC_68129 POPSEQ: contig: morex_contig_54255 chr: 2 cM: 3.15448050128454 BLAST2GO: nbs-lrr disease resistance protein homologue Length=4410, 3740-3808 nt of sequence
3272114	ABS/RC ETo/RC TRo/RC WUE	TGCAGCTCGGCGGTCCGCCAACTACGCTCCCAGCTCCTGGAATTACGACTCCCTCCTCCAGCTCTCACC			> AK366999 BLAST2GO: myrcene chloroplastic-like, Length=1701
3273166	RWC WUE	TGCAGGCCGTTGGCGAGCTCGCCCGCGCTGAAGCCGATGATGTCTTGGGGCCATCCGTTGCACCCGTCA	Hordeum vulgare subsp. vulgare mRNA for predicted protein, complete cds, clone: NIASHv1136M02, 100%/93%, AK361281.1,571-639nt of mRNA (cds region)	BAJ92488.1	> AK361281 MLOC_8366 POPSEQ: contig: morex_contig_142194 chr: 2 cM: 2.19546742209632 BLAST2GO: 3 -n-debenzoyl-2 -deoxytaxol n-benzoyltransferase-like Length=1383, 533-601 nt of gene
3273988	ABS/RC DIo/CS PIABS PIcsm PIcso RC/CSm RC/CSo Tro/RC	TGCAGGCGCGCGCAGAGCAAGGTGCTGGTGCTCGCCTGGGTCGGCGTCGCCG	AK374414.1 Hordeum vulgare subsp. vulgare mRNA for predicted protein, complete cds, clone: NIASHv3064C11 100%/100% AK374414.1, 692-743 nt of gene (cds region)	BAK05610.1	> AK360719 MLOC_12193 POPSEQ: contig: morex_contig_1562765 chr: 7 cM: 69.1096591753137 BLAST2GO: protein transparent testa 12-like Length=1437, 10-52 of marker, 508-550 nt of gene
3274182	ABS/RC PIABS PIcsm PIcso RC/CSm RC/CSo TRo/RC WUE	TGCAGGAACTTGGCCGTGGGGAAGCTGACGGCGAAGGAGAGGGAGCCG	Hordeum vulgare subsp. vulgare mRNA for predicted protein, complete cds, clone: NIASHv3064C11 100%/98% AK374414.1, 695-648nt of gene	BAK05610.1
3432939	RWC TRo/RC WUE	TGCAGTACTGTGGGTGTAGAAAGGAGCCCCTCCAAAGCCCATTTTGGATTAGGATCCCAACCAGCAAAG			> MLOC_3720.1 POPSEQ: contig: morex_contig_132897 chr: 2 cM: 2.19546742209632 BLAST2GO: nbs-lrr disease resistance protein homologue Length=1383, 29-69 nt of marker, 928-888 nt of gene
3433049	RWC WUE	TGCAGTTTCTGAGGCTTTGGGGTGTGCAAGGCATGGGGACACTGGAGCCGCTCTCAAACCTCTCCTCTC	PREDICTED: Aegilops tauschii subsp. tauschii putative disease resistance protein RGA3 (LOC109751680), transcript variant X5, mRNA 80.6 80.6 100%/86% XM_020310571.1, 3987-4055nt of mRNA	XP_020166160.1	> MLOC_68129.3 MLOC_68129 POPSEQ: contig: morex_contig_54255 chr: 2 cM: 3.15448050128454 BLAST2GO: nbs-lrr disease resistance protein homologue Length=4410, 1-60 nt of marker, 3740-3808nt of gene
3433111	RWC WUE	TGCAGTCTCTGGCGCTTAGGGGTCTGCAAGGCATGGGGACACTGGAGCCCCTCTCAAACCTCACCTCTC	PREDICTED: Brachypodium distachyon putative disease resistance protein RGA3 (LOC106865841), mRNA 65% /96% XM_024456923.1, 25-69 nt of marker, 4002-4046 of mRNA (cds region)	XP_024312691.1	> MLOC_3720.1 MLOC_3720 POPSEQ: contig: morex_contig_132897 chr: 2 cM: 2.19546742209632 BLAST2GO: nbs-lrr disease resistance protein homologue Length=1383, 704-772 of gene
3433113	RWC TRo/RC WUE	TGCAGATGGGCTCAGAAAGGAGCCCCATGACGTCATTCGTCCATATCTCCTTCAATGTCTGTTGCTCGT	Hordeum vulgare subsp. vulgare mRNA for predicted protein, partial cds, clone: NIASHv1064E11 100%/100% AK357893.1		> MLOC_69492.2 MLOC_69492 POPSEQ: contig: morex_contig_5650 chr: 7 cM: 140.580736543909 BLAST2GO: nbs-lrr disease resistance protein homologue, Length=4401, 1-43 nt of marker, 4043-4021 nt of gene
3433167	RWC WUE	TGCAGTCCCTGGATCTTTGGGGTGTGAAAGGCATGGGGACACTGGAGCCCCTCTCAAACCTCTCCCTTG	PREDICTED: Aegilops tauschii subsp. tauschii putative disease resistance protein RGA3 (LOC109751680), transcript variant X5, mRNA 94%/89% XM_020310571.1, 3987-4051 nr of mRNA (cds region)	XP_020166160.1	> MLOC_3720.1 MLOC_3720 POPSEQ: contig: morex_contig_132897 chr: 2 cM: 2.19546742209632 BLAST2GO: nbs-lrr disease resistance protein homologue Length=1383
3433655	RWC TRo/RC WUE	TGCAGCAGCGTGCCGAGAACCAGCCCCAGGACGTGCAGCGCAAGGGCCTCCCCG	PREDICTED: Aegilops tauschii subsp. tauschii isoflavone 2'-hydroxylase-like (LOC109779903), mRNA 100%/81% XM_020338510.1, 1409-1356 mRNA (cds region)	XP_020194099.1	> MLOC_5438.1 MLOC_5438 POPSEQ: contig: morex_contig_136274 chr: 7 cM: 70.5382436260624 BLAST2GO: abc transporter b family member 1-like Length=4113, 21-51 nt of marker, 2103-2133 nt of gene
3661780	ABS/RC PIcsm PIcso RC/CSm RC/CSo WUE	TGCAGCCACAGCACGGTCGGCCATGGCGCCGTGCCGTTGTCCACGCGGTGGGGGCTCCG	PREDICTED: Aegilops tauschii subsp. tauschii serine carboxypeptidase-like 51 (LOC109765428), mRNA 100%/95% XM_020324214.1, 215-157 mRNA (cds region)	XP_020179803.1	> AK365289 MLOC_62900 POPSEQ: contig: morex_contig_47076 chr: 1 cM: 95.8923512747875 BLAST2GO: serine carboxypeptidase-like 51-like Length=1371
3662546	ABS/RC ETo/RC TRo/RC WUE	TGCAGAATCATTAAAATTACCTCCTCTGCGACGGCGCTCCG
3662618	RWC TRo/RC WUE	TGCAGGCCGTTGGCGAGCTCGCCCGCGCTGAAGCCGATGATGTCTTGGGGCCGTCAGTGGCGCCGAGAT	Hordeum vulgare subsp. vulgare mRNA for predicted protein, complete cds, clone: NIASHv1136M02 94%/100% AK361281.1, 571-635 nt of mRNA	BAJ92488.1	> AK361281 MLOC_8366 POPSEQ: contig: morex_contig_142194 chr: 2 cM: 2.19546742209632 BLAST2GO: 3 -n-debenzoyl-2 -deoxytaxol n-benzoyltransferase-like, Length=1383 533-597 nt of gene
3914074	ABS/RC RC/CSm RC/CSo RWC TRo/RC	TGCAGGGTTGTGGCGCTAGAATTGCTCTAGACATTGCCCAGCATCGTCCCACCACCACACCCCAAAGTG			> MLOC_44743.2 MLOC_44743 POPSEQ: contig: morex_contig_275282 chr: 2 cM: 1.68565427945844 BLAST2GO: nbs-lrr disease resistance protein homologue Length=2565, 686-754 nt of gene
3985849	ABS/RC DIo/CS RC/CSm WUE	TGCAGGCGCGCGCAGAGCAAGGTGCTGGTGCTCGCCTGGGTCTCGGCTTCCACGTCGCGCTCACCTACC	Hordeum vulgare subsp. vulgare mRNA for predicted protein, complete cds, clone: NIASHv3064C11 100%/84% AK374414.1 (cds region)	BAK05610.1	> AK360719 MLOC_12193 POPSEQ: contig: morex_contig_1562765 chr: 7 cM: 69.1096591753137 BLAST2GO: protein transparent testa 12-like Length=1437, 10-69 nt of marker, 508-580 nt of gene
3987313	ABS/RC RC/CSm WUE	TGCAGGGACTTGGCCGTGGGGAAGCTGACGGCGAAGGAGAGGGGGCCG	Hordeum vulgare subsp. vulgare mRNA for predicted protein, complete cds, clone: NIASHv3064C11 100%/98% AK374414.1, 695-648 nt of mRNA	BAK05610.1	> AK360719 MLOC_12193 POPSEQ: contig: morex_contig_1562765 chr: 7 cM: 69.1096591753137 BLAST2GO: protein transparent testa 12-like Length=1437, 506-459 nt of gene
4188851	RWC TRo/RC WUE	TGCAGACGGACACACGCAGGCCGAGGAGAGAGACCAGGCGGAGGTCGATTCCTGGGGCGTGCGCGCCAG	PREDICTED: Aegilops tauschii subsp. tauschii bisdemethoxycurcumin synthase-like (LOC109759063), mRNA 95% /85% XM_020317905.1, 515-450 nt of mRNA (cds region)	XP_020173494.1	> MLOC_22196.1 MLOC_22196 POPSEQ: contig: morex_contig_160368 chr: 7 cM: 26.7129336689152 BLAST2GO: curcuminoid synthase-like, Length=1182, 15-64 nt of marker, 455-406 nt of gene
4191362	ETo/RC RWC TRo/RC	TGCAGTCGGACTGTGTGGACTCGGCGTGGCAGAGGCCGCGGACGAAAGTGCCGTCGGGCCCAGCCCCCA	Hordeum vulgare subsp. vulgare mRNA for predicted protein, partial cds, clone: NIASHv1133N09, 75%/88% AK361153.1, 294-243 nt of mRNA	BAJ92360.1	> MLOC_64775.1 MLOC_64775 POPSEQ: contig: morex_contig_49309 chr: 5 cM: 168.888888888889 BLAST2GO: cysteine-rich receptor-like protein kinase 29-like, Length=1953, 264-213 nt of gene
4197350	RC/CSo RWC TRo/RC	TGCAGCTGGATGCAGACTGCACGGCCG	PREDICTED: Aegilops tauschii subsp. tauschii alpha,alpha-trehalose-phosphate synthase [UDP-forming] 6-like (LOC109733289), mRNA 100%/ 96% XM_020292483.1, 2041-2067 nt of mRNA	XP_020148072.1	> MLOC_67.1 MLOC_67 POPSEQ: contig: morex_contig_100416 chr: NA cM: NA BLAST2GO: -trehalose-phosphate synthase, Length=2481, 1915-1941 nt of gene
4331021	RWC WUE	TGCAGCACCAGCACATGAAATCGAGCATGTTCCG	Hordeum vulgare subsp. vulgare mRNA for predicted protein, complete cds, clone: NIASHv2061A08 97%/94%, AK367713.1, 4250-4218 nt of mRNA (out of cds)	BAJ98916.1	> AK375083 MLOC_75935 POPSEQ: contig: morex_contig_6950 chr: 7 cM: 70.5382436260624 BLAST2GO: 2609025 protein, Length=1851
4505558	ETo/RC RWC TRo/RC	TGCAGCACAAGCAAACATGTCCGAGATCGATCGCCG	Hordeum vulgare subsp. vulgare mRNA for predicted protein, partial cds, clone: NIASHv3126B16, 100%/100% AK376503.1, 786-831 nt of mRNA (cds region)	BAK07698.1	> AK376503 BLAST2GO: probable lrr receptor-like serine threonine-protein kinase at3g47570-like, Length=3198 93-128 nt of mRNA
5242232	RWC WUE	TGCAGAGACGAGTCGGGTTCCGTTGACGAGTTACCG			> MLOC_3664.1 MLOC_3664 POPSEQ: contig: morex_contig_132510 chr: 2 cM: 5.52407932011331 BLAST2GO: protein kinase domain containing Protein, Length=1638, 1489-1518 nt of sequence
5242270	RWC WUE	TGCAGCGGGGCGAGGCCGCCGAGGCGCGACGGGTGGAGGGTCTCGGCCGTGAGGTTGCACCG	PREDICTED: Aegilops tauschii subsp. tauschii cytochrome P450 89A2-like (LOC109752476), mRNA, 100%/89% XM_020311363.1, 349-288 nt of mRNA (cds region)	XP_020166952.1	> AK368496 MLOC_50992 POPSEQ: contig: morex_contig_36814 chr: 2 cM: 6.44475920679887 BLAST2GO: low quality protein: cytochrome p450 89a2-like Length=1428, 335-274 nt of sequence
3255818	PIABS PIcsm PIcso RC/CSm	TGCAGTATATGCAACCCGTTATCTCTACGGTTTGTGATAAGTAGTGTTGAAGCTGCTGTGCGACTTATC
3255819	PItotal Ψo	TGCAGCAGTACAGTGGAAGTGAGCTGATGCTACTGCTCATTTTTCAGTTGTTAGTACGTTGGGACTTGA
3256304	TRo/RC WUE	TGCAGAGACCAAGTAGGTGAATTCACAGGAGGATCACGTGAGAAATATAGCGAATTAAGGACAGCCAGG
3256554	ABS/RC DIo/CS PIABS PIcsm PIcso RC/CSm RC/CSo TRo/RC	TGCAGGCATGCAAAGTCATGGGCCCAAGGACAACTGCTGAACATGTACGCATGCGTACGGAGGCACGAA
3260095	ABS/RC ETo/RC TRo/RC WUE	TGCAGCTGCTGCTCCCACAAGGGTACGCGGATCAAAAGTAACTTTTAGTTTATAGCATCAAAAAAAGTA
3263616	ABS/RC ETo/RC RC/CSm RC/CSo TRo/RC WUE	TGCAGGAGGACCTCTGGTCACTGCTTCATAGAACTCTGCCGTCACCCCTGCCACCCAGCTTGATGTACC
3263913	ABS/RC PIABS PIcsm PIcso RC/CSm RC/CSo TRo/RC WUE	TGCAGGCCAGAGTGAGCTACTTTCGCTTTTTCACCGAGAAAACCAAGGAGCTAGCTAGGACCG
3264065	ETo/RC RWC TRo/RC	TGCAGATGCCAGCCCGCTGCAAATTGTTGTATTGTATGTACAACAGCACAGTAGCTACAGGTCAAACAA
3265725	ETo/RC RWC TRo/RC	TGCAGTTGCCACACAATTGTAATTTGTATACTCATTTAAGTTGAGAGAACAAATCCAAGCTGTTGAAGG
3265741	ABS/RC ETo/RC RC/CSo TRo/RC WUE	TGCAGCCACCCTCCTGCTCCAGGTCACAGAGAGGGATTCACCCTCGTTGCCAGGCTCCATAACATACTC
3266375	RC/CSo TRo/RC WUE	TGCAGTGGAATCACACCATATTTTCACCTTCCTCAACTTCCCCATGCAACTCATCAGCTGCGCAAACCC			> MLOC_6270.1 MLOC_6270 POPSEQ: contig: morex_contig_137307 chr: NA cM: NA BLAST2GO: nbs-lrr resistance protein analog 1, Length=2685, 1929-1861nt of sequennce
3266703	RC/CSo RWC TRo/RC	TGCAGCCGCTCCCTCACGCCCCTGCCCTGCCCTTGCCCG
3267590	RWC WUE	TGCAGCCCGCCGAAGCATATGCCGATGGGAACCCCTTCTCATCGTACTTGTACCCTGCCG
3267904	RWC WUE	TGCAGTGCCAGTCTATTGCAGTATTAATTGATTTGCTACTTCATCATCCCCTGAATGTCAAATCAAATG
3268226	ABS/RC ETo/RC PIABS PIcsm RC/CSm RC/CSo RWC TRo/RC	TGCAGGCCCCTCCTCGTGCACCCAGTCACACTTTGCTAACACATAGTCGTGCTGCTGCTCGACTGCCGC
3268724	ABS/RC ETo/RC TRo/RC WUE	TGCAGCATATATTTTTTTATTGGCGAGGGTCAGGTCAATGTTGCTTGCTTAGCAATACGAGGCGCCTAC
3268792	ABS/RC ETo/RC TRo/RC WUE	TGCAGCTGCCATGGCATTGGCTGCGGTTCAGGTCAAAAAATTTGGACGAAAAAAACGAAAGTTTCCGAG
3268862	ETo/RC RWC TRo/RC	TGCAGTTAGCAGTAACTTGGTAAGCAAACTGAATTAACAACGAGAGGAGCAAAGTCAGGCCCATAGATA	Hordeum vulgare subsp. vulgare mRNA for predicted protein, complete cds, clone: NIASHv2114C18, 98%/97%,1964-2031nt (out of cds region), AK370666.1	BAK01865.1	> MLOC_36685.1 MLOC_36685 POPSEQ: contig: morex_contig_2547179 chr: NA cM: NA BLAST2GO: resistance protein rga2, Length=3708, 169-183nt of sequence
3270748	RWC WUE	TGCAGTTTCTGTAATGTGTTGAATCCATCGACTAGTAACAGATGGATTCAGAATTTTGCTATCGAAGGT
3270848	DIo/CS PIABS Picsm	TGCAGAGCCGCGTCTACCTCCTTCCAACCGTCGGTCGCCACCCTGTGCACGAGCAGTGCCGCGGCAGCG
3271091	ABS/RC ETo/RC RC/CSm RC/CSo RWC TRo/RC	TGCAGTATATTATGAAAGCCACAATGTGTTTTGTAGTTACAGTATTTGTGGTGGTACTTGGTGATCCGA
3271732	ABS/RC ETo/RC TRo/RC WUE	TGCAGCCGAGCAACGCACCGTTGACGGTGACGACGTCCG
3271896	RWC WUE	TGCAGTGCTTCCATTGGGACAGGGTCGGCGACGCACCG
3272175	ABS/RC ETo/RC RC/CSo TRo/RC WUE	TGCAGTAGTCAACCGATCATTGTCCAGACGCGTCCATGATTATTTAAGAGTCGGGTTTGCGAAGTCCGA
3272800	ETo/RC RWC TRo/RC	TGCAGTGGCACTGTCTACGCCTTTTGTACAGTCTGGTGCTGGGCACAAACCG
3272803	ABS/RC ETo/RC PIABS PIcsm RC/CSm RC/CSo RWC TRo/RC	TGCAGCTCTCGTGCATTGAGGCATGGGAATGGATCCAGGGGGTCCTCGCGATCCTCCTGGTAGTCTCCA
3272876	RWC WUE	TGCAGCTGATGGATGCGATGGCTGACGACCGAGATAACGAGCTGCATGCATGCACCTCGGCCTCCAAAC
3273456	RWC TRo/RC WUE	TGCAGGCATCACTTCGGGGAGGAGGGGAAAGAGGAGACTTTTGACCG
3273846	RWC TRo/RC WUE	TGCAGGTCGTGCAAGCCCCAGCCAGCGCCGTCGCCGAAGCCTCCAGCGGTGCCTTCTCCGACACCTACA
3274404	RC/CSo RWC TRo/RC	TGCAGTCAATGGGCAAGTTGCACAACAAAGTCGCCCG	Hordeum vulgare subsp. vulgare mRNA for predicted protein, complete cds, clone: NIASHv2144D06, 100%/100%,621-585nt (out of cds region), AK371968.1	BAK03166.1
3274898	ETo/RC RWC TRo/RC	TGCAGCTCGTGCGCTAGAACGACGCACGTCACGCGCTGCTGCTGGCCG
3276412	RWC WUE	TGCAGTGCAACAAGCGTTGTGTTCCGACCCG
3276759	RWC TRo/RC WUE	TGCAGCCAAGGCCATAGCCGAGTGGGGCTGTCCG
3276935	RWC WUE	TGCAGGGCGTCTATCTAGGGTCTTGACTAGTGGTTCAGCCCCATGGCCTAGACAAAATCGTATGGATGT
3396022	RWC WUE	TGCAGTATGGGCCGCACTTGCGAAAGCAGCGCTCCAAGGGCCCATAGCGGCATAGGCCCCATAGGTTAC
3396266	ABS/RC ETo/RC TRo/RC WUE	TGCAGTGTTGCTTGCATGGGCCAGCCCACTAGCACACGAGTACCG
3396312	TRo/RC	TGCAGGCAAGCAACTACTAATGCCTAATTAATTGCGCTCGCTTTACATAGCTCGCTCTGCATGAATTGG
3396411	PItotal	TGCAGCACATTGTTCTCAGGGAAGGCATCAAAGACGACATCGTTTGGAAGCTCTCGACCGATGGAAAAT
3396455	RC/CSo TRo/RC	TGCAGCACGCGTCGGCAGTTTTTGGTGCGCAATTACTTTCGGTTTGCAGAGGAAAGATCACAGCTGGGC
3396518	Eto/RC	TGCAGTTATTACTCCATATAAGTTCTATGAACCAACTGTTCCATTGCGGTTTTTCTTTTTTTCCTTTTT
3396539	Tro/CS	TGCAGAGAGGGAGGAAGATTTTAGAGCAAGGCGCAGACTCATCAAGCAAAGGCCTGGCATTGGCCGAGA
3396590	PItotal RC/CSm RC/CSo	TGCAGTGACAATAGAATCGATACAAGGGATTCCTACAATAACATAACAACATAAAATTAAGTTGAGATA
3396691	ABS/RC ETo/RC TRo/RC WUE	TGCAGCAATAAAAGAAAAAGCTCACAGTACAAACCCAACAGCAAGAACTTACTCGTAGCATCTGCAACA			> MLOC_54089.3 MLOC_54089 POPSEQ: contig: morex_contig_38874 chr: 7 cM: 70.6090651558074 BLAST2GO: rna-binding protein 42-like, 540-556nt of sequence, 1-17nt of marker
3396845	ETo/RC TRo/RC WUE	TGCAGAAGAGTAATGAGGCGGCATGGGAGTGGAGGTGCCCACCTTGCCGCATGAAGCCAACATGCTGAG
3397701	ABS/RC DIo/RC Fv/Fm RC/CSm WUE	TGCAGAGGCAGAGAGGGATCTAGCTGCTTTTGACACTGACTGTGCCTCTCTGTGTTTGTGAAAAAAGCC	Hordeum vulgare genomic DNA fragment; clone MWG2269, 86%/92%, AJ234873.1, 10-69nt of marker, 405-345nt of DNA
3397739	RWC WC	TGCAGGCGTCCATTTGCAGAATTGCACAGTAACAAGCGTCTGTCGCGCTAAATAGGATTCGCCCCGCGC
3398039	RC/CSo RWC TRo/RC	TGCAGCAGACATTCACCTGAAGTTACCGAACCCCTTTTTCAAGAAGCTACTGAAGATACGGTGTACATG
3429790	RC/CSo RWC TRo/RC WUE	TGCAGAAGTGTCCGACGTATAACTTTTCCAGTGAATCCG			> MLOC_23781.1 MLOC_23781 POPSEQ: contig: morex_contig_162954 chr: 2 cM: 2.26628895184136 BLAST2GO: probable disease resistance rpp8-like protein 4-like, Length=282, 24-39 nt of marker, 200-185nt of sequence
3430606	RWC WC	TGCAGAGCCAGGAGACGCAGGAGGAGCCCTACGCGTACCAGGACGAGACCACCAAGAAGAGGCCGAGAT	PREDICTED: Aegilops tauschii subsp. tauschii histone H2B.11-like (LOC109767733), mRNA, 94%/96%, XM_020326451.1, 347-414nt of mRNA (cds region)	XP_020182040.1	> MLOC_7816.3 MLOC_7816 POPSEQ: contig: morex_contig_140241 chr: 1 cM: 132.365439093484 BLAST2GO: rho gdp-dissociation inhibitor 1, Length=723, 18-46nt of marker, 556-584nt of gene
3430622	RWC WUE	TGCAGATGTGACGACCTCGGACGTGCACGGTATGACCACTGGAACCG
3432859	RWC WUE	TGCAGTTTCATGGCAGTAATACTCCTCGCCCAGTCCAGGTCAGCACGCAATTACCCTATCCG
3432923	RWC WUE	TGCAGGGCGCAGGCAGAGCACATGAGAGCTCACCTTTGTGAGTGGTGGTTCCACCCGACGGAGCATGAG
3432948	RWC WUE	TGCAGCAGACGGGAAAACTGGTTGGACAGAGCTCTCGCAGTGTGCTGAATGACAAGGCTTCGCCCTTGG
3432984	RWC WUE	TGCAGCATGCCTTGCCAGCCGAAGGTCAAGACAGTAAAAGTGTAAAACACTTGAACCACCATAGGAGAA
3433124	RWC TRo/RC WUE	TGCAGAGGAGCCAAGATCACAGGATCACGGATCGTTGTCAACCCCATCCCCG
3433188	RWC WUE	TGCAGTTCCCACTTGTGCACAACAATGCCTCCACGTACTACCAGGTCACAAATTGGTGTTTTCAAATCA
3433198	RWC TRo/RC WUE	TGCAGTATTGTGGAAACTGTTGTCAGGCGGTGAAAATGCTATGTTACTACTAGAGGTGGTCGGAGAGGC
3433220	RWC WUE	TGCAGCTATAGCTAGTGCGTGTGTGTGTGGAGTAGAATGGCTCCG
3433272	RWC TRo/RC WUE	TGCAGGGCGCAGGCAGAGCACATGAGAGCTCACCTTTGTGAGTGGTGGTTCCACTTCCACCAGACGGAG
3433431	ETo/RC RWC WUE	TGCAGTAGTCGACCGATCATCGTCCAGACGCGTCCACGGTTATTTAAGAGTCGGGTTTGCGAAGTCCGA
3666374	ABS/RC DIo/RC ETo/RC PIABS RC/CSm RC/CSo RWC TRo/RC	TGCAGGAGCAGGAGCAGGAGCAGAAGCAGAAGCAGCAGGAGGCGGGAGGGGAGCTCCCG
3667042	RWC WUE	TGCAGGACATGGAGGCAGGAACTTTCGCTGTTGGCAGTATGATCACGAACTCCATCGTGAACTTCGCCA
3923017	ETo/RC RWC TRo/RC	TGCAGGAAAAGCTGTACAATAAAATGATGCCCTAGCGGCGAACTGCAATAAAATACAACGGCAGATGGA
3929883	ABS/RC ETo/RC RC/CSm RC/CSo TRo/RC WUE	TGCAGACGTGTCAACCTCGGACGTACATACGTGTGTACTCTCGGCGACTATTCAACTCATAGCGCGATT
3930718	ABS/RC ETo/RC TRo/RC WUE	TGCAGGTATGCACAGCAGCTTCAACACAAATTGATTGTGCAGACTGATGTGTATGTTCCAATGTTCCAT
3985684	ABS/RC ETo/RC TRo/RC WUE	TGCAGGTAAATTGATCGTGTTGCTCCCTGACACGGTGTTACCGACCTACACGCTCTCACTGCTCATTTA
3985779	RWC WUE	TGCAGCTTCGCCGGCACGCGTTGCACTGTGGCTTCATCGACGACGAGATCCG
3985855	ABS/RC ETo/RC TRo/RC WUE	TGCAGCAAACCAGACTCCCTATCCGCCCGCGGATGCTTTTAGACGTTTGGTGGACATGAATACGGAAAC
3986552	RWC WUE	TGCAGCCTTATCGAGCGCTCGCTGCACTTCCCACCTGATATCAAGCACCATCGTTAGTATTGTCTTTCG
3986596	RWC WUE	TGCAGTTTATACTTCTACACGAACGCACAGAGGCATACGCGGTGGAAACAATAGCTACAGACCTGCAAT
3986621	ABS/RC RC/CSm WUE	TGCAGGCCAGAGTGAGCTACTTTCGCTTTTTCACCGGGAAAACCAAGAAGCTAGCTAGGACCG
4000003	ETo/RC TRo/RC WUE	TGCAGGACCGTGCTCAACCTCAACGGCTGCTCCG
4015393	ABS/RC PIABS PIcsm PIcso RC/CSm RC/CSo TRo/RC WUE	TGCAGGCAGAAAGCTTGTGCCTGGAGCTGAGGCAGCGGAATCACCTGCCCCCGAATTTGTAGGCAAAAT
4015789	RWC WUE	TGCAGCTCATCACAGCCAGAAACCTAGAACAGCGGCTGTGTTGGCTTCCCG
4185014	RWC WUE	TGCAGCCCATAGAGTGATACAGCTCAGCCGCCG
4192195	RWC TRo/RC WUE	TGCAGGTCAGCGACCAGCGTCCG
4197053	RC/CSo RWC TRo/RC	TGCAGCTGCACACAAAGCGGTTCTTGTTCTTGGCATAATTCCGTTCCGTCACGAGATGGACGACGGGGT
4415167	RWC TRo/RC WUE	TGCAGGAGCGAACGTACCGACGATCACGCCGACGGTTCCGTGGCGGTGGCCG
4781722	ABS/RC ETo/RC RC/CSm RC/CSo RWC TRo/RC	TGCAGCTGCTACTGGCCTCGGCCACGGCCGCACCG
4785347	ETo/RC RWC TRo/RC	TGCAGGCCAGAAATGCAGGATCAGGAGGTGGCCG
4790522	ABS/RC ETo/RC TRo/RC WUE	TGCAGCGACGTCACGCCGCCACCACCG
4790672	ABS/RC TRo/RC WUE	TGCAGCTCCGCTAGCTGTGCCG
5239818	RWC TRo/RC WUE	TGCAGGCCGTCGTGGGCGGCGGCATGATCGGCCGAGGCCCATCGAGCGGCCGAGGCCGCTGCCTCCGCC
5241005	ABS/RC ETo/RC RC/CSm RC/CSo RWC TRo/RC	TGCAGCTGGTGGGGCAACGACGATGGAAAGGCCCGACGACGTTTGGCGGTGGCGCGCACGGTGGGGTGG
5241796	RWC TRo/RC WUE	TGCAGGTCGGCGACCAGCATCCG
5255948	RWC WUE	TGCAGAGCAGTCGCGGTGGTGCGATGCAGACCG
5257078	RWC WUE	TGCAGCTGGATCCCGAGTCCCTCAGCCG
5258247	RWC WUE	TGCAGTGGTGAGCATGGGCGTTGCCCCGTTATCACGCCG
6265773	ETo/RC RWC TRo/RC	TGCAGCTCAAGTATAAATGAGGTCTCTACCG
6428845	ABS/RC ETo/RC RC/CSo RWC TRo/RC	TGCAGCTGTGGCTGTGACAAGGCCG
6436424	RWC WUE	TGCAGAGGTCAAGTGGCTTGCGTCCGCGGATGGGAACGTCCACAAGACAATCTAGCTAGCCGTCCGTCG
6437490	ABS/RC PIABS PIcsm PIcso RC/CSm RC/CSo TRo/RC WUE	TGCAGGCGAGCGGGGCACATCAGCCG
3397741*	RWC WUE	TGCAGCCCTCCCGGCAGATCGGCTTTGGCCTTCGTGGTTGCAGTCGCCGTCAACCAGGATCTCAGGCCT
6270581*	ABS/RC ETo/RC RC/CSm RC/CSo TRo/RC WUE	TGCAGTAGAACTAGTTTTGCTTTTATCTCTGAATATAGTACAGTTCATAACATAAGAAATGCCCTGAAA
3256487*	RWC WUE	TGCAGTAATTATTACTAAATCCTTGCTTTCGCAGTTGGGCCCATGGCTAGATGTCAACCG
3433304*	ETo/RC RWC TRo/RC	TGCAGCGTCGTCGTGGAGGACGGCGACATCGACTTGGTCGTCGCCCAGAGCCCTGTTCTGGAGACACTG
3664649*	RWC WUE	TGCAGCGATGTACGAAGTGAGGCATGTCGCTGGATGGAAAGAAAAGAAGCCGAGGAAGGGAGGAGGAGG
3276935*	RWC WUE	TGCAGGGCGTCTATCTAGGGTCTTGACTAGTGGTTCAGCCCCATGGCCTAGACAAAATCGTATGGATGT
3398303*	RWC WUE	TGCAGAAAACGACTCTGAACTTTGCAAAGATGTTTCTCTGTTCCATTCCTTAATTTCAGTTTTCAGCTA
100006857*	RWC TRo/RC WUE	TGCAGACGTGCACCAAGGCGTCATGGGGGACGGCCG
100008524*	ETo/RC RWC TRo/RC	TGCAGCGACATGTGCTGGGCCG
3255612*	RC/CSo RWC TRo/RC	TGCAGTACATGAAACATCTACTCCTACAAGGAAAAGGAATGGATTGGATGCGAACCTGATGCCGTGTCC
3255610*	RC/CSo RWC TRo/RC	TGCAGCGACTTCGTTCGTTACATAAATTTGATTACCGCCGACCTGTGGGCAACTCGAGTTCTAGAGAAG
3267971*	ETo/RC RWC WUE	TGCAGGAAGGTAGGCAAGTTCGCACCATTTCCGATTTCTCAAGCGTTGTTGCGTCGCCAACCG
4171695*	ABS/RC ETo/RC RWC TRo/RC	TGCAGCAGCAGGTCTGGGTCATGGCTTGCTTGCCTTGCCG
3256248*	RWC WUE	TGCAGGTATGCACAGCCTCAACAGAAATCCGTCGTGCTGCTCCCTGAGAAGATGATGCTCCGTGATGAA
3267548*	ETo/RC RWC TRo/RC WUE	TGCAGGTTTCGATTAGCACATTTTGCCTTTAACCAACGCATGTGGCGCTAAATAGGGATTGCCG	Hordeum vulgare subsp. vulgare cultivar Morex Rfm1 gene locus, complete sequence, 100%/83%, MF443757.1, 451224-451287nt of mRNA	AVY91565.1	> MLOC_4314.2 MLOC_4314 POPSEQ: contig: morex_contig_135007 chr: 5 cM: 44.166 BLAST2GO: glutamate-rich wd repeat-containing protein 1-like, Length=1449, 1085-1099 nt of sequence
100002589*	RWC WUE	TGCAGCATGTAATCGCACTCCAAAATACATCTATGTGTGCCTACAACGCGCTCATCCG			> MLOC_16150.1 MLOC_16150 POPSEQ: contig: morex_contig_1572543 chr: 6 cM: 52.8328611898017 BLAST2GO: l-type lectin-domain containing receptor kinase like, Length=2052, 1312-1291 nt of sequence
3398212*	ABS/RC ETo/RC RC/CSm RC/CSo RWC TRo/RC	TGCAGTGAGGTGCCGCTCTCAGTCACCCTTTCTACACATCTTTTGAACCTGCCG
5241796*	RWC TRo/RC WUE	TGCAGGTCGGCGACCAGCATCCG
3434097*	RWC TRo/RC WUE	TGCAGCAATGACTCCCATGTGTGTGTTAATTTAAGTATGTAATCTGTGAGACAAATCTGTCCG			> AK355129 MLOC_68021 POPSEQ: contig: morex_contig_54072 chr: NA cM: NA BLAST2GO: beta galactosidase-like protein, Length=3366, 830-795 nt of sequence
8651146*	RWC TRo/RC WUE	TGCAGGGCGGTCTCGTCCCCG
100004924*	ABS/RC RC/CSm RC/CSo WUE	TGCAGGCCAGAGTGAGCTACTTTCGCTTTTTCACCGGGAAAACCAAGAAGCTAGCTAGGACCG
3254933*	ABS/RC PIcsm RC/CSm RC/CSo WUE	TGCAGCTGTTCCGTGTATTGGAGCTAAATAATGAGTGCAACATTTCGGTGTCCTCTGCATCCG
